# Supplementary material for: The Role of Treatment-Related Parameters and Brain Morphology in the Lesion Volume of Magnetic-Resonance-Guided Focused Ultrasound Thalamotomy in Patients with Tremor-Dominant Neurological Conditions
Source: MDPI journal article supplement (doi:10.3390/bioengineering11040373), 2024-04-12
Supplement: s1 [file s1]

## The Role of Treatment-Related Parameters and Brain Morphology in the Lesion Volume of Magnetic-Resonance-Guided Focused Ultrasound Thalamotomy in Patients with Tremor-Dominant Neurological Conditions

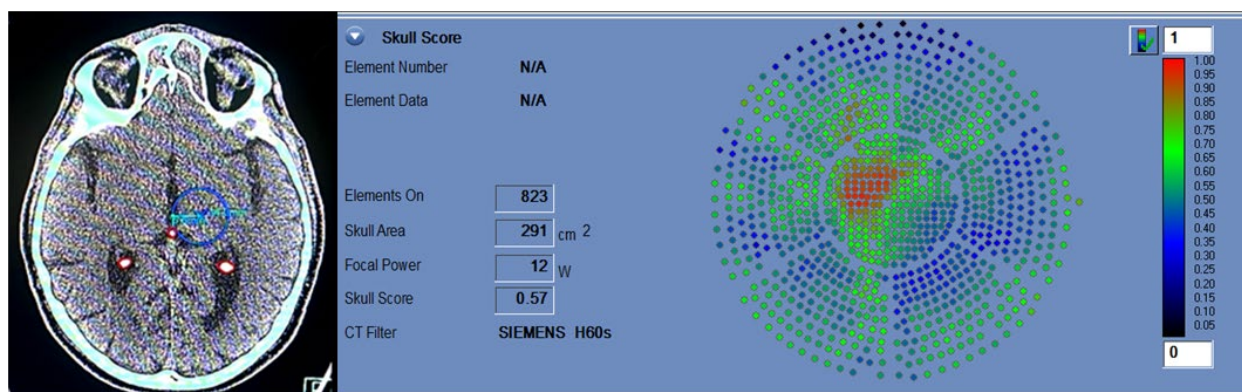

**Figure S1.** CT imaging. SDR, Skull Area and numbers of elements in use were calculated to evaluate treatment eligibility.

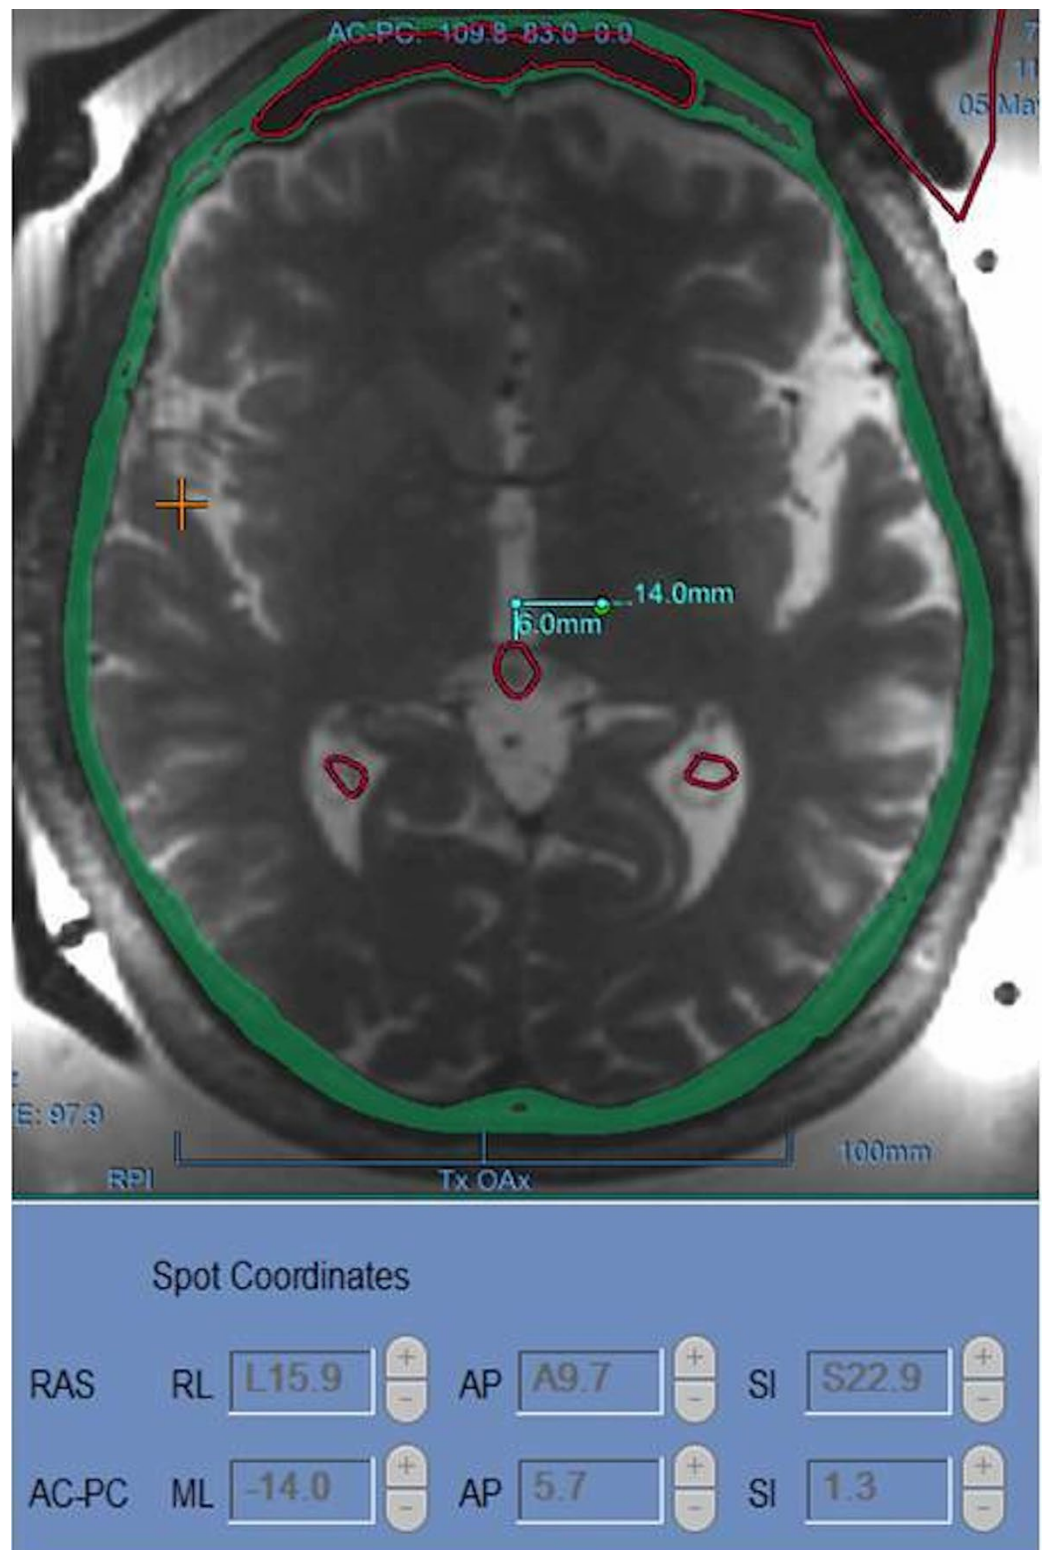

Figure S2. MRgFUS: Target position on the T2-weighted image.

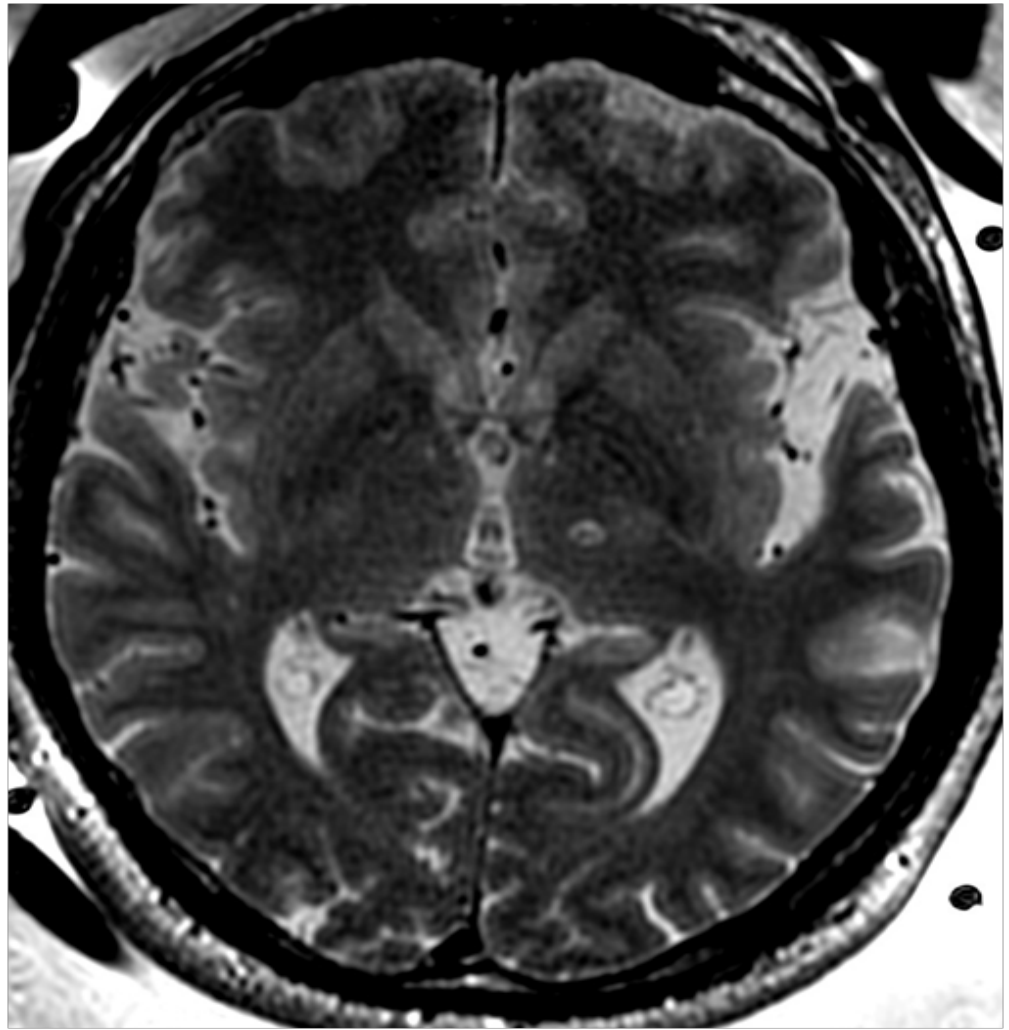

**Figure S3.** Axial FRFSE T2-weighted images after MRgFUS. The image shows the resulting thalamic lesion. The necrotic core appears hypointense and is surrounded by cytotoxic edema.

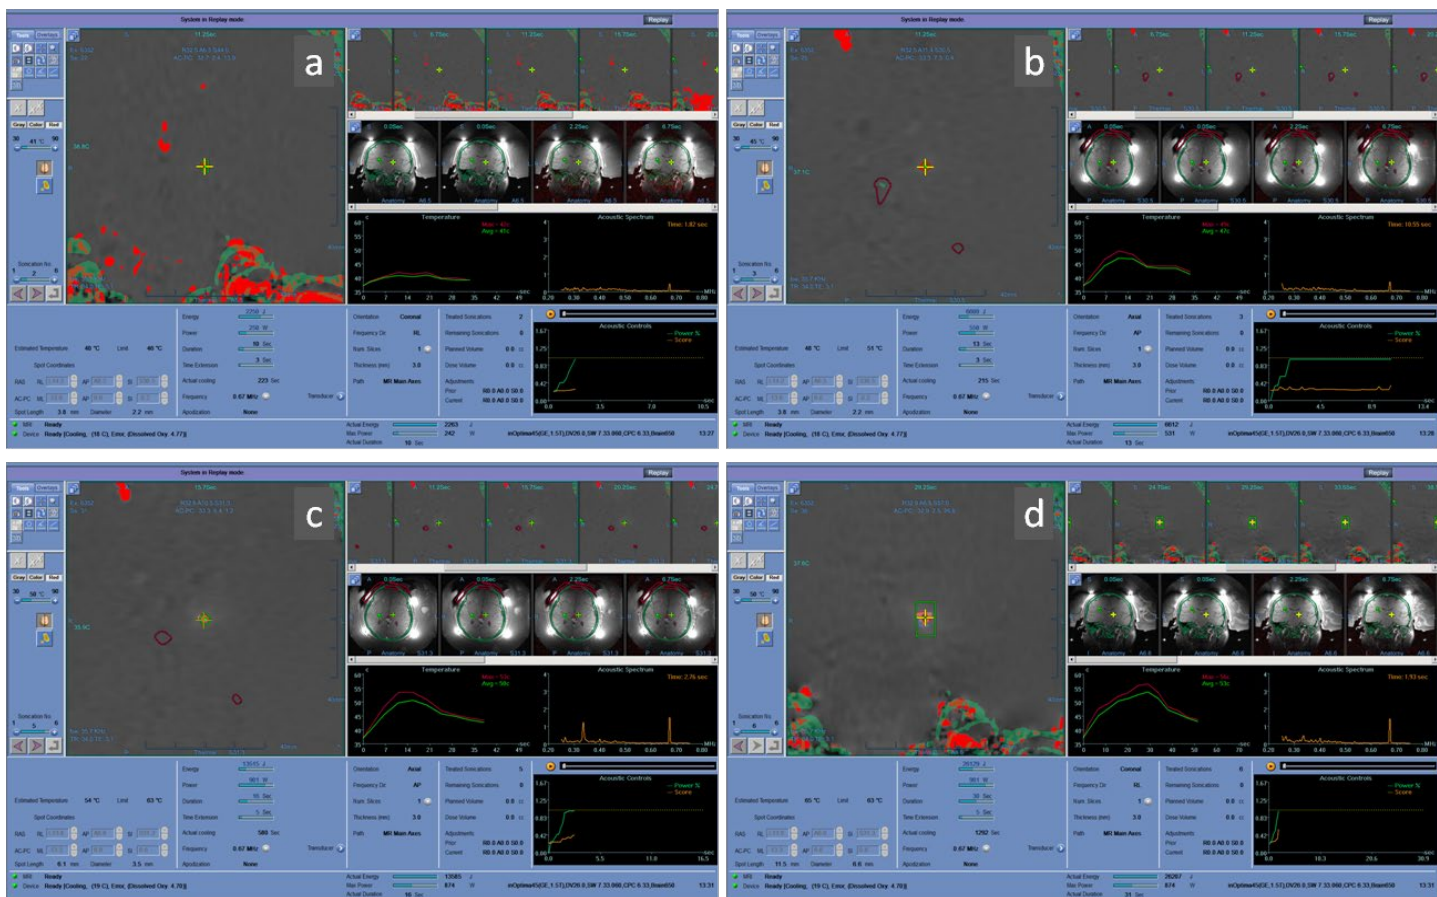

Figure S4. MRgFUS treatment- MR-thermometry procedure: a) Alignment; b) Verification; c-d) Treatment.

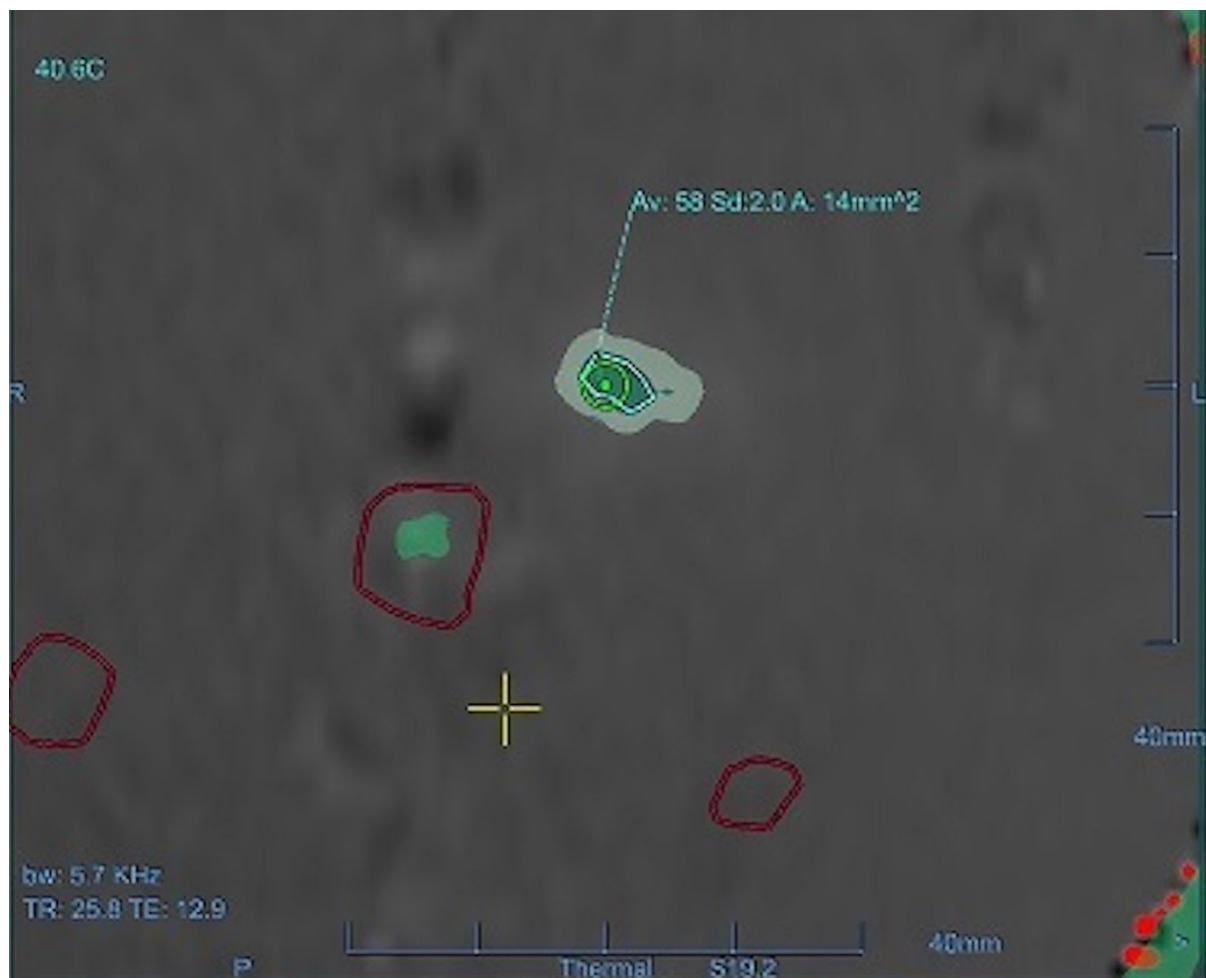

**Figure S5.** ATD is calculated from the thermometric map of the last sonication drawing a manual ROI on the target.

**Table S1.** Brain structural characteristics of the ET and PD population before MRgFUS treatment.

|                                                    | PD<br>(n = 19) | ET<br>(n = 17) | <i>p-value</i> <sup>e</sup> |
|----------------------------------------------------|----------------|----------------|-----------------------------|
| Normalized GM Volume (cm <sup>3</sup> )            | 323.2 ± 34.2   | 329.7 ± 37.3   | n.s.                        |
| Normalized WM Volume (cm <sup>3</sup> )            | 296.5 ± 37.1   | 288.4 ± 46.3   | n.s.                        |
| Normalized CSF Volume (cm <sup>3</sup> )           | 378.5 ± 44.8   | 375.7 ± 52.8   | n.s.                        |
| Normalized Brain Volume (GM+WM) (cm <sup>3</sup> ) | 619.9 ± 48.4   | 618.2 ± 49.3   | n.s.                        |
| Total Cortical Thickness (mm)                      | 2.51 ± 0.2     | 2.59 ± 0.1     | n.s.                        |

Abbreviations: n.s.: not significant

**Table S2.** Characterization of incident Adverse Events observed during MRgFUS



|                              | PD<br>(n = 19) | ET<br>(n = 17) | <i>p-value</i> <sup>e</sup> |
|------------------------------|----------------|----------------|-----------------------------|
| Motor Fluctuations           | 1              | 3              | 0.999                       |
| Dyskinesias                  | 0              | 1              | 0.999                       |
| Impulse control disorder     | 1              | 2              | 0.999                       |
| Nausea                       | 0              | 2              | 0.540                       |
| Leg edema                    | 1              | 1              | 0.999                       |
| Hypotension                  | 0              | 3              | 0.532                       |
| Daytime sleepiness           | 0              | 4              | 0.272                       |
| Anxiety/agitation            | 0              | 2              | 0.540                       |
| Skin reaction to rotigotine  | 0              | 2              | 0.540                       |
| Nausea/vomit                 | 6              | NA             | NA                          |
| Scalp Numbness               | 1              | NA             | NA                          |
| Dizziness                    | 6              | NA             | NA                          |
| Headache                     | 2              | NA             | NA                          |
| Uncomfortable heat sensation | 3              | NA             | NA                          |
| Anxiety                      | 1              | NA             | NA                          |
| Neck pain                    | 1              | NA             | NA                          |

Abbreviations: AE, Adverse Event; MRI, Magnetic Resonance Imaging; PD-FUS, NA, Not Applicable.

**Table S3.** Clinical changes in motor and tremor scores before and after MRgFUS treatment.

|                                                                      | Baseline    | Post-treatment | % Improvement | p-level   |
|----------------------------------------------------------------------|-------------|----------------|---------------|-----------|
| Total UPDRS score (PD patients)                                      | 37.3 ± 12.5 | 29.7 ± 11.7    | 28.8 ± 15.8   | p < 0.001 |
| Hemi-UPDRS ( <i>affected side</i> ) (PD patients)                    | 23.3 ± 6.6  | 15.8 ± 7.3     | 34.7 ± 16.5   | p < 0.001 |
| Total CRST score (ET patients)                                       | 58.3 ± 15.2 | 36.4 ± 12.1    | 38.7 ± 11.8   | p < 0.001 |
| Hemi-CRST ( <i>affected side</i> ) (ET patients)                     | 42.4 ± 12   | 20.3 ± 6.8     | 52.6 ± 13.9   | p < 0.001 |
| <b>% Clinical improvement for treated right-VIM ablation (n° 16)</b> |             |                |               |           |
| Total UPDRS score                                                    | 36.6 ± 11.7 | 29.6 ± 11.7    | 19.1 ± 10.1   | p < 0.001 |
| Hemi-UPDRS ( <i>affected side</i> )                                  | 23.1 ± 7.3  | 16.1 ± 8.4     | 30.3 ± 8.1    | p < 0.001 |
| Total CRST score                                                     | 51.2 ± 22.6 | 30.2 ± 16.8    | 41.1 ± 19.9   | p < 0.001 |
| Hemi-CRST ( <i>affected side</i> )                                   | 35.5 ± 17.6 | 16 ± 10.95     | 54.9 ± 16.7   | p < 0.001 |
| <b>% Clinical improvement for treated Left-VIM ablation (n° 20)</b>  |             |                |               |           |
| Total UPDRS score                                                    | 38.5 ± 14.7 | 30 ± 12.6      | 22.1 ± 11.8   | p < 0.001 |
| Hemi-UPDRS ( <i>affected side</i> )                                  | 23.6 ± 5.8  | 15.1 ± 5.9     | 36 ± 5.9      | p < 0.001 |
| Total CRST score                                                     | 60.4 ± 12.6 | 38.3 ± 10.4    | 36.6 ± 11.9   | p < 0.001 |



Skull Density Ratio (SDR), Max\_Watt: maximum energy delivered (watt); Max\_Joule: maximum power delivered (joule); Max\_Time: maximum sonication time delivered; T°C\_max: maximum mean temperature reached; ATD: accumulated thermic dose; N.S. not significant

**Table S5.** Simple linear regression among procedural MRgFUS parameters in PD patients (n°19).

|                   | SDR | Skull area | n° of elements                 | n° of sonications | Max_Watt | Max_Joule                       | T°C_max                         | Max_Time                        | ATD                             | Necrosis-volume                 | Edema volume                    | Delta Total UPDRS              | Delta Hemi-UPDRS |
|-------------------|-----|------------|--------------------------------|-------------------|----------|---------------------------------|---------------------------------|---------------------------------|---------------------------------|---------------------------------|---------------------------------|--------------------------------|------------------|
| SDR               |     | n.s        | n.s                            | n.s               | n.s      | Rho = -.664;<br><i>p</i> = .002 | n.s                             | Rho = -.597;<br><i>p</i> = .007 | n.s                             | n.s                             | n.s                             | n.s                            | n.s              |
| Skull area        |     |            | Rho = .468;<br><i>p</i> = .043 | n.s               | n.s      | n.s                             | n.s                             | n.s                             | n.s                             | n.s                             | n.s                             | Rho =-.469;<br><i>p</i> = .043 | n.s              |
| n° of elements    |     |            |                                | n.s               | n.s      | n.s                             | n.s                             | n.s                             | n.s                             | Rho = -.621;<br><i>p</i> = .005 | Rho = -.464;<br><i>p</i> = .046 | n.s                            | n.s              |
| n° of sonications |     |            |                                |                   | n.s      | Rho = .547;<br><i>p</i> = .015  | n.s                             | n.s                             | n.s                             | n.s                             | n.s                             | n.s                            | n.s              |
| Max_Watt          |     |            |                                |                   |          | Rho =.729;<br><i>p</i> < .0001  | Rho = -.558;<br><i>p</i> = .013 | Rho = .611;<br><i>p</i> = .005  | Rho = -.487;<br><i>p</i> = .035 | n.s                             | n.s                             | n.s                            | n.s              |
| Max_Joule         |     |            |                                |                   |          |                                 | Rho = -.68;<br><i>p</i> = .001  | Rho = .879;<br><i>p</i> < .0001 | Rho = -.667;<br><i>p</i> = .002 | n.s                             | n.s                             | n.s                            | n.s              |
| T°C_max           |     |            |                                |                   |          |                                 |                                 | Rho = -.612;<br><i>p</i> = .005 | Rho = .715;<br><i>p</i> = .001  | n.s                             | Rho = .477;<br><i>p</i> = .039  | n.s                            | n.s              |
| Max_Time          |     |            |                                |                   |          |                                 |                                 |                                 | Rho = -.627;<br><i>p</i> = .004 | n.s                             | n.s                             | n.s                            | n.s              |
| ATD               |     |            |                                |                   |          |                                 |                                 |                                 |                                 | n.s                             | n.s                             | n.s                            | n.s              |



|                   |  |                                   |     |                                |
|-------------------|--|-----------------------------------|-----|--------------------------------|
| Necrosis volume   |  | Rho =<br>-.623;<br><i>p</i> =.004 | n.s | n.s                            |
| Edema volume      |  |                                   | n.s | n.s                            |
| Delta_Total_UPDRS |  |                                   |     | Rho = .956;<br><i>p</i> <.0001 |
| Delta_Hemi_UPDRS  |  |                                   |     |                                |

**Table S6.** Simple linear regression among procedural MRgFUS parameters in ET patients (n°17).

|                   | SDR | Skull area | n° of elements                    | n° of sonications | Max_Watt | Max_Joule                     | T°C_max | Max_Time                           | ATD                                | Necrosis-<br>volume               | Edema<br>volume | Delta<br>Total<br>CRST | Delta<br>Hemi-<br>CRST |
|-------------------|-----|------------|-----------------------------------|-------------------|----------|-------------------------------|---------|------------------------------------|------------------------------------|-----------------------------------|-----------------|------------------------|------------------------|
| SDR               |     | n.s        | n.s                               | n.s               | n.s      | n.s                           | n.s     | Rho =<br>-.528;<br><i>p</i> = .029 | Rho<br>= .530;<br><i>p</i> = .029  | n.s                               | n.s             | n.s                    | n.s                    |
| Skull area        |     |            | Rho<br>= .642;<br><i>p</i> = .005 | n.s               | n.s      | n.s                           | n.s     | n.s                                | Rho<br>= .548;<br><i>p</i> = .023  | Rho<br>= .495;<br><i>p</i> = .043 | n.s             | n.s                    | n.s                    |
| n° of elements    |     |            |                                   | n.s               | n.s      | n.s                           | n.s     | n.s                                | Rho<br>= .502;<br><i>p</i> = .040  | n.s                               | n.s             | n.s                    | n.s                    |
| n° of sonications |     |            |                                   |                   | n.s      | n.s                           | n.s     | n.s                                | n.s                                | n.s                               | n.s             | n.s                    | n.s                    |
| Max_Watt          |     |            |                                   |                   |          | Rho =.674;<br><i>p</i> = .003 | n.s     | Rho = .515;<br><i>p</i> = .034     | n.s                                | n.s                               | n.s             | n.s                    | n.s                    |
| Max_Joule         |     |            |                                   |                   |          |                               | n.s     | Rho = .502;<br><i>p</i> =.040      | Rho =<br>-.640;<br><i>p</i> = .006 | n.s                               | n.s             | n.s                    | n.s                    |
| T°C_max           |     |            |                                   |                   |          |                               |         | n.s                                | Rho<br>= .657;                     | Rho<br>= .672;                    | Rho<br>= .589;  | n.s                    | n.s                    |

|                  |  |  |                                  |            |            |     |                            |
|------------------|--|--|----------------------------------|------------|------------|-----|----------------------------|
|                  |  |  | $p = .004$                       | $p = .003$ | $p = .013$ |     |                            |
| Max_Time         |  |  | Rho =<br>-.488;<br>$p$<br>= .047 | n.s        | n.s        | n.s | Rho = -.538;<br>$p = .026$ |
| ATD              |  |  |                                  | n.s        | n.s        | n.s | n.s                        |
| Necrosis volume  |  |  |                                  |            | n.s        | n.s | Rho = -.545;<br>$p = .024$ |
| Edema volume     |  |  |                                  |            |            | n.s | n.s                        |
| Delta_Total_CRST |  |  |                                  |            |            |     | Rho = .793;<br>$p < .0001$ |
| Delta_Hemi_CRST  |  |  |                                  |            |            |     |                            |
